# Supplementary material
Source: PubMed Central journal article supplement (PMC6562021)
Supplement: mmc1.pdf [file mmc1.pdf]

**The American Journal of Human Genetics, Volume 104**

**Supplemental Data**

**Geographic Variation and Bias in the Polygenic Scores  
of Complex Diseases and Traits in Finland**

**Sini Kerminen, Alicia R. Martin, Jukka Koskela, Sanni E. Ruotsalainen, Aki S. Havulinna, Ida Surakka, Aarno Palotie, Markus Perola, Veikko Salomaa, Mark J. Daly, Samuli Ripatti, and Matti Pirinen**

## Supplemental Figures

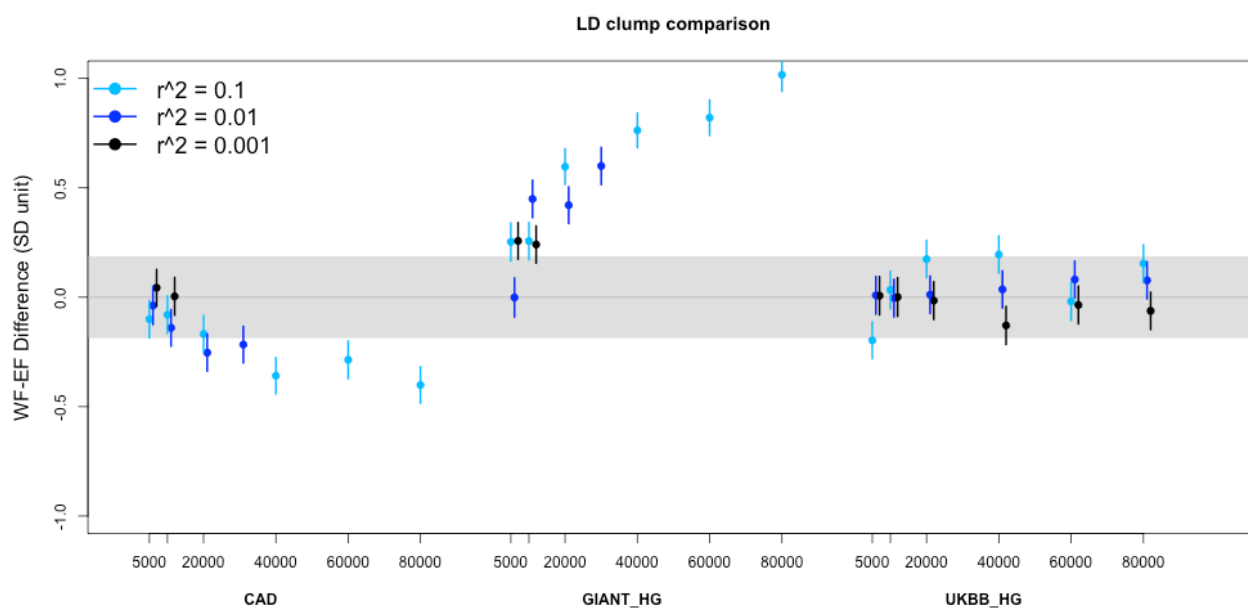

**Figure S1. Comparison of different LD-clumping thresholds.**

Comparison of different  $r^2$  thresholds on differences between Western and Eastern subpopulations in randomly chosen variants with GWAS P-value  $> 0.5$ . The solid region is the 95% probability interval under the theoretical null assumption of zero effect sizes and completely independent variants ( $r^2 = 0$ ). Error bars refer to 95% confidence interval in t-test between subpopulations.

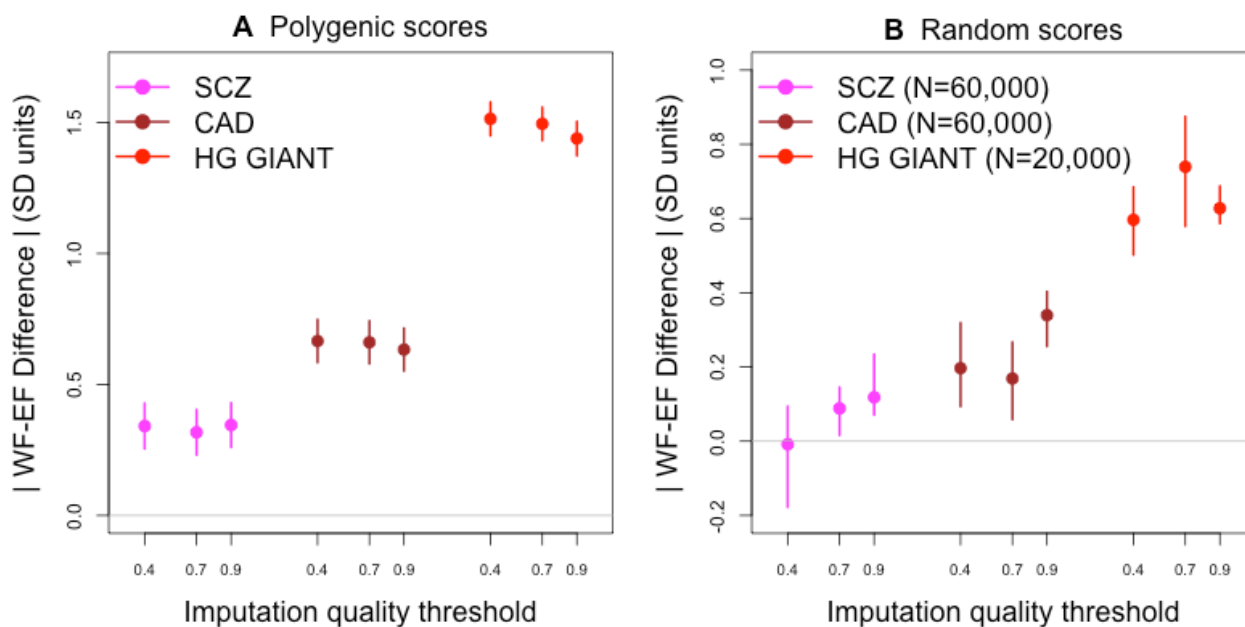

**Figure S2. Comparison of different imputation quality filters.**

**A)** comparison for trait associated polygenic scores and **B)** for random scores. Error bars in panel A) refer to 95% confidence interval in t-test between Eastern and Western subpopulations and in panel B) min-max-range from 10 randomly sampled scores with the same number of variants.

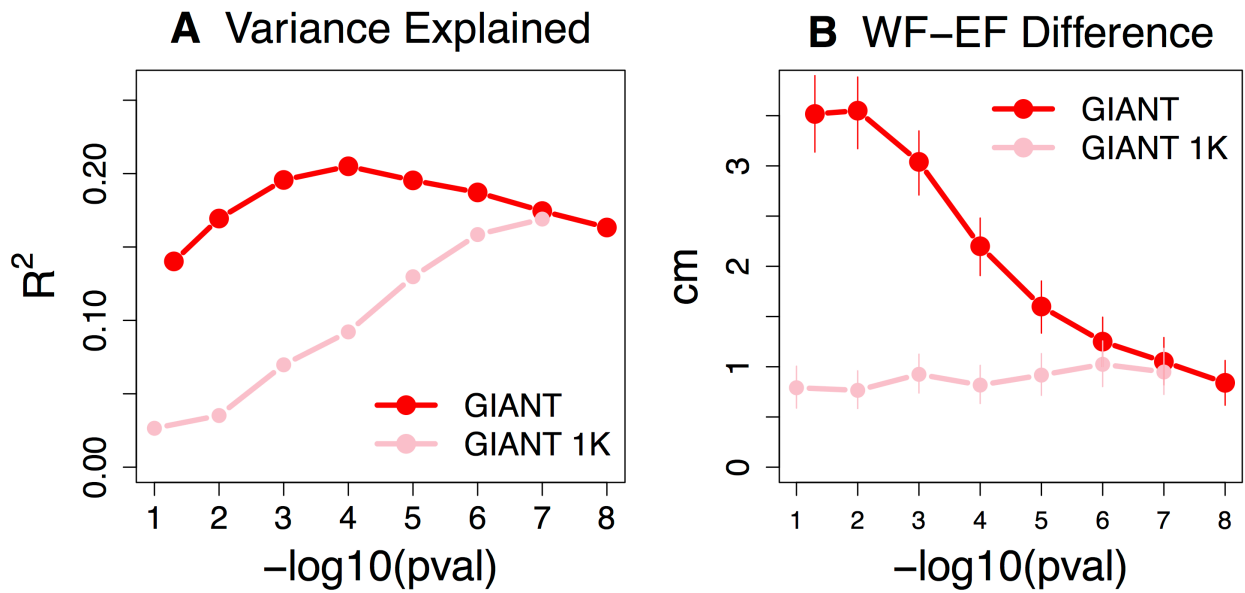

**Figure S3. Comparison of different P-value thresholds.**

**A)** Height variance explained by GIANT-PS and a subset of GIANT-PS with at most 1,000 randomly sampled variants, as a function of P-value threshold in GIANT data. **B)** predicted West-East difference in height by the two PS, as a function of P-value threshold in GIANT data. Variance explained is given as adjusted  $R^2$ . Error bars refer to 95% credible interval.

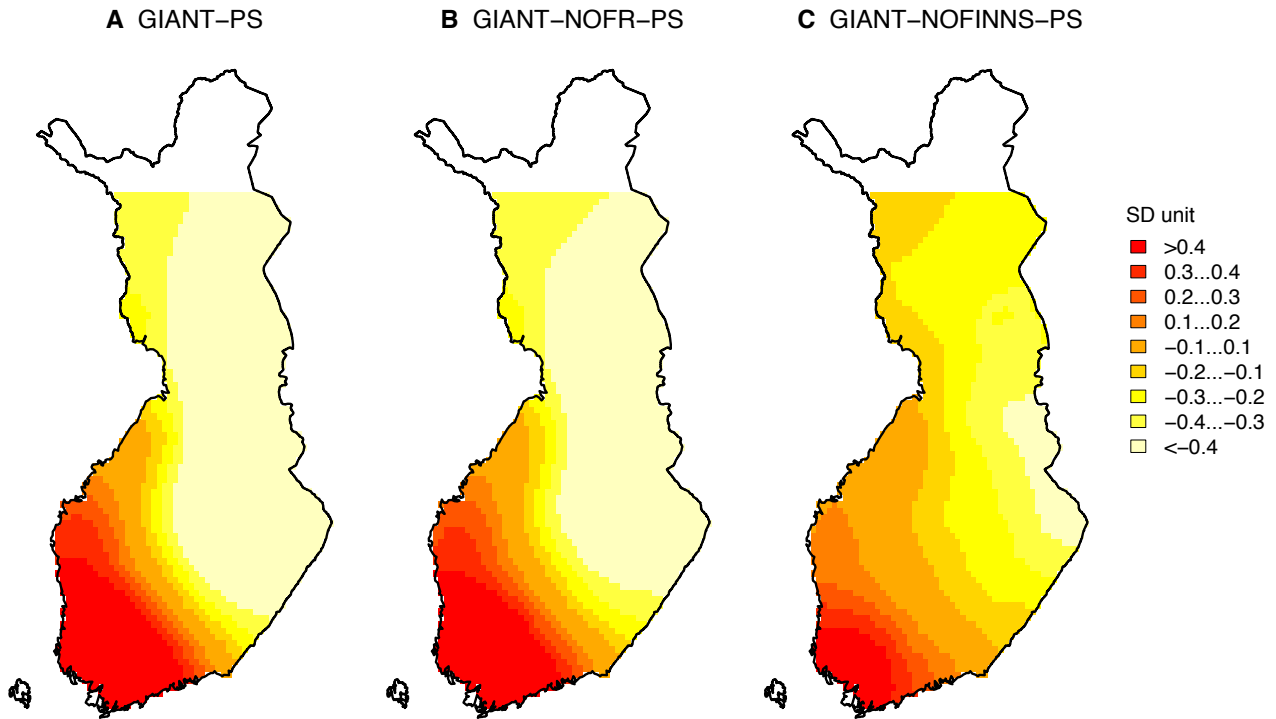

**Figure S4. Distribution of polygenic scores (PS) for HG.**

PS are based on **A)** the original GIANT consortium meta-analysis, **B)** GIANT meta-analysis without cohorts including samples from the National FINRISK Study and **C)** GIANT meta-analysis without any Finnish samples.

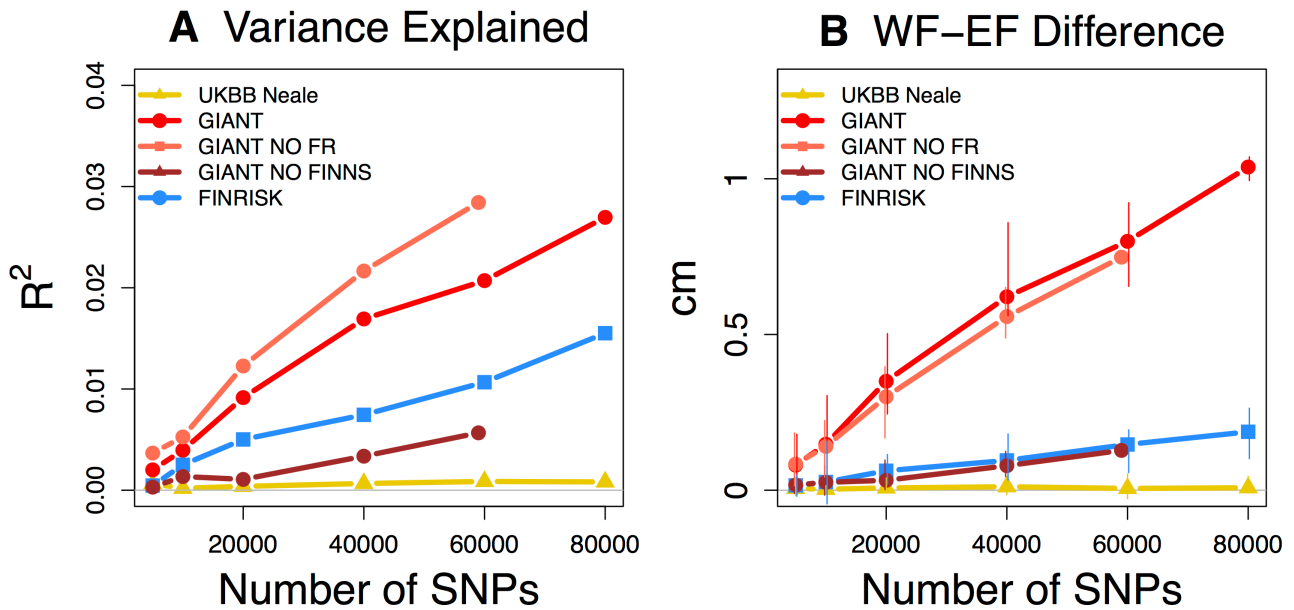

**Figure S5. Comparison of PS for HG based on random SNPs.**

**A)** Height variance explained by PS and **B)** predicted East-West difference in Height by PS, as a function of the number of independent variants in PS when all variants have P-value > 0.5 in GWAS. Variance explained is given as adjusted R<sup>2</sup>. Both R<sup>2</sup> and WE difference is based on the mean of 10 random scores and error bars in panel B refer to a min-max-range of the 10 PS. For GIANT NO FR and GIANT NO FINNS we generated random PS including 59,000 variants instead of 60,000 as in other PS because of the lack of independent variants.

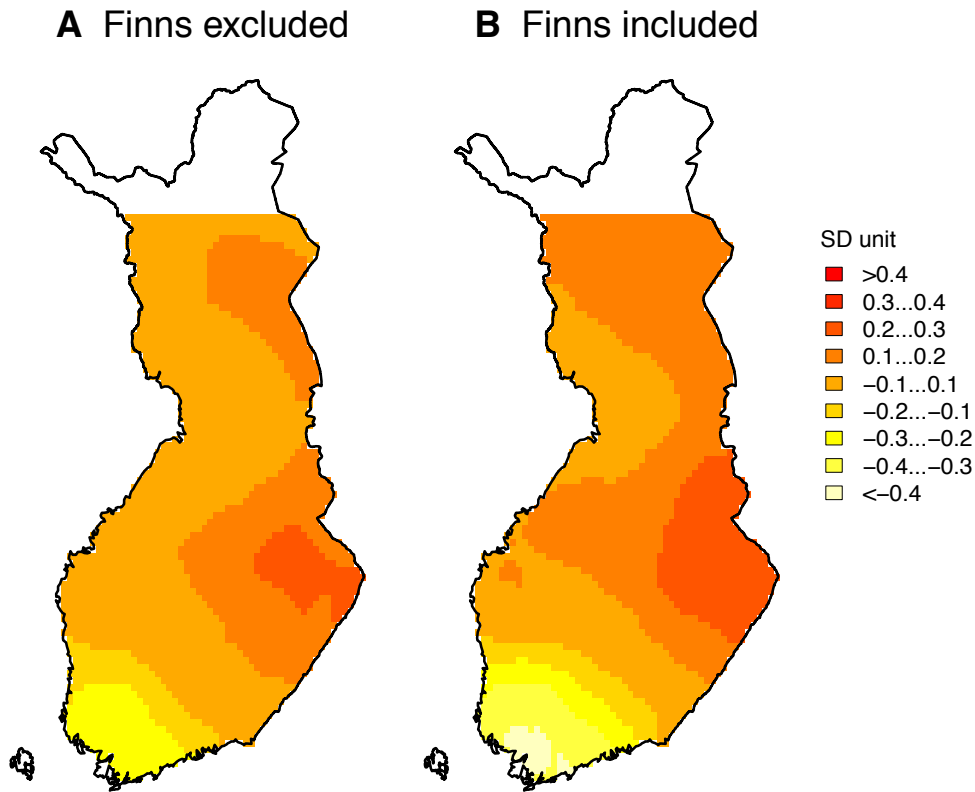

**Figure S6. Distribution of polygenic scores for schizophrenia.** PS are based on GWAS **A)** excluding Finnish samples and **B)** including Finnish samples.

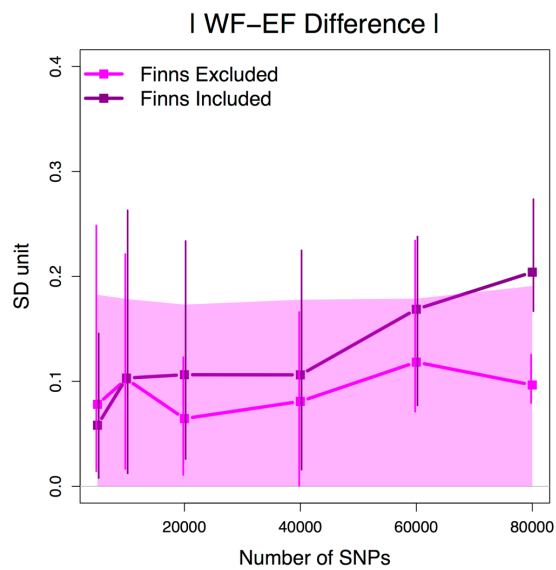

**Figure S7. PS differences between Eastern and Western subpopulations using different numbers of independent variants randomly chosen with GWAS P-value > 0.5.** Results for PS built based on SCZ GWAS with excluding (magenta) and including (dark violet) Finnish samples. WE difference is based on the mean of 10 random scores and error bars refer to a min-max-range of the 10 PS.

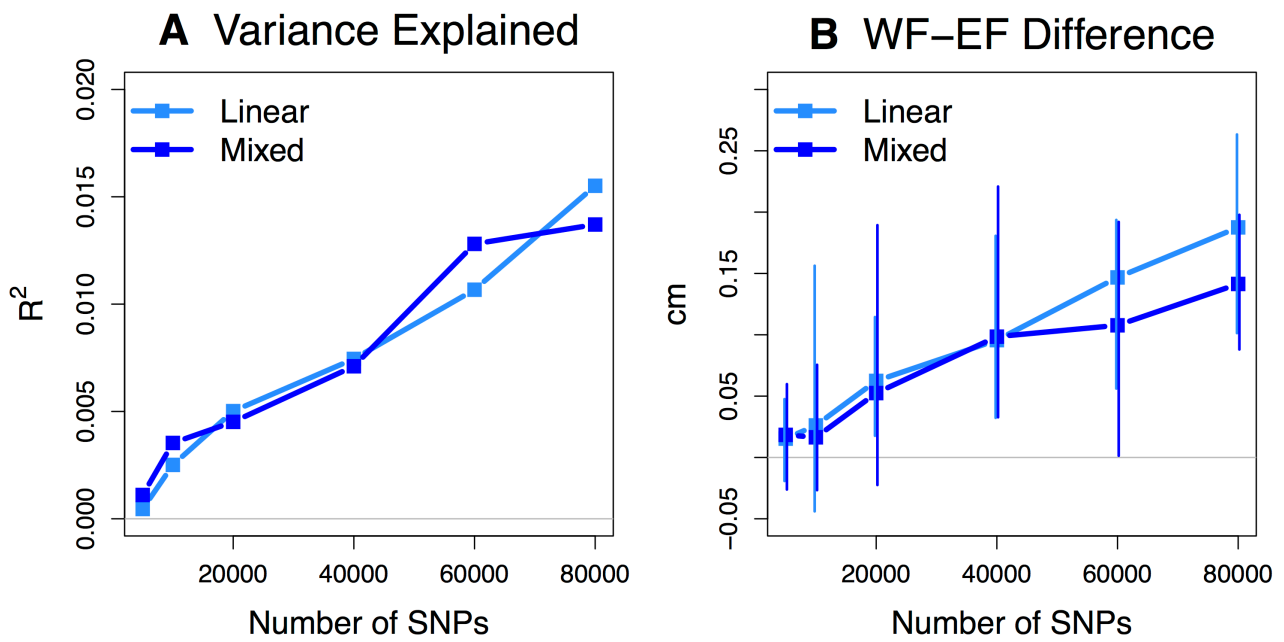

**Figure S8. A comparison between random PS from the height GWAS on the FINRISK cohort ran with standard linear model or linear mixed model.**

**A)** Height variance explained by PS and **B)** predicted West-East difference in height by PS, as a function of the number of independent variants in PS. Random PS were built based on variants with P-value > 0.5 in GWAS. Variance explained is given as adjusted R<sup>2</sup>. Both R<sup>2</sup> and WF-EF difference is based on the mean of 10 random scores and error bars in panel B refer to a min-max-range of the 10 PS.

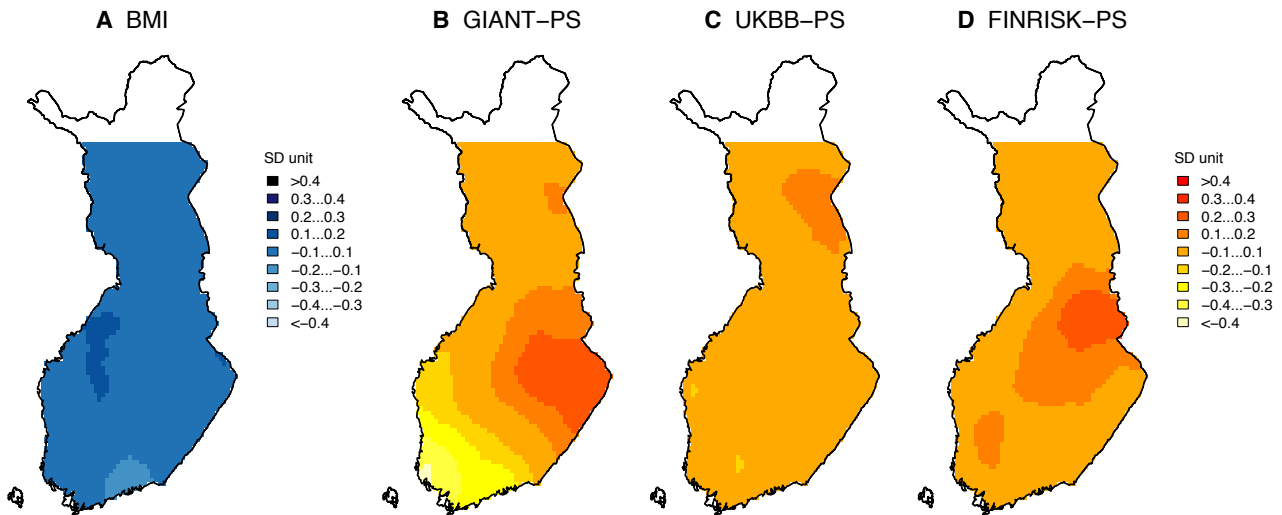

**Figure S9. Geographic distributions for BMI.**

A) Distribution of sex, age and age<sup>2</sup> adjusted BMI and polygenic score (PS) distributions of B) GIANT-PS, C) UKBB-PS and D) FINRISK-PS for BMI in Finland. The values are in standard deviation unit. The observed BMI does not show differences between subpopulations (95% CI: -0.12, 0.59).

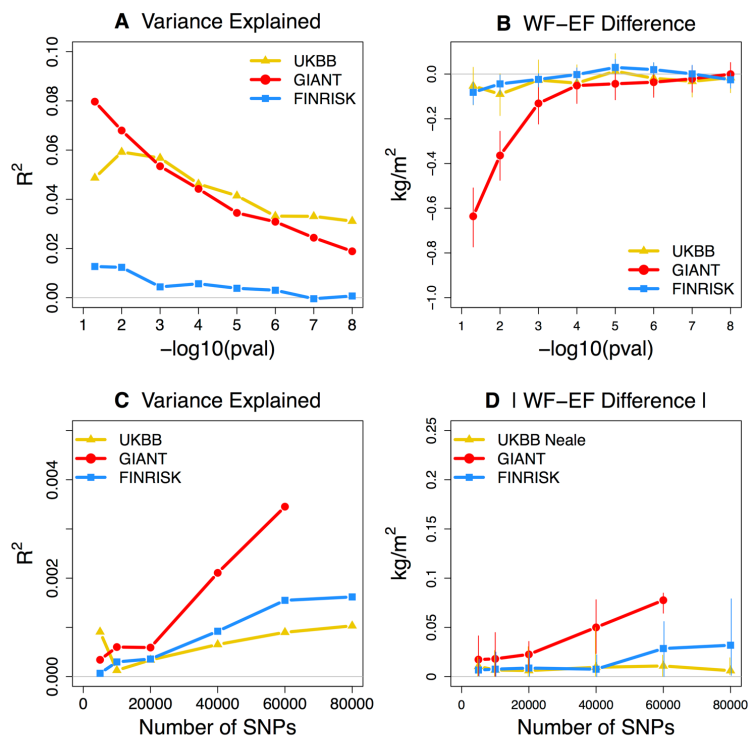

**Figure S10. Comparison of PS constructed from BMI-associated versus random SNPs.**

Top row: A) BMI variance explained by PS and B) predicted East-West difference in BMI by PS, as a function of P-value threshold in GWAS data.

Bottom row: C) BMI variance explained by PS and D) predicted East-West difference in BMI by PS, as a function of the number of independent variants in PS when all variants have P-value > 0.5 in GWAS. Variance explained is given as adjusted R<sup>2</sup>. Both R<sup>2</sup> and WF-EF difference is based on the mean of 10 random scores and error bars in panel D refer to a min-max-range of the 10 PS.

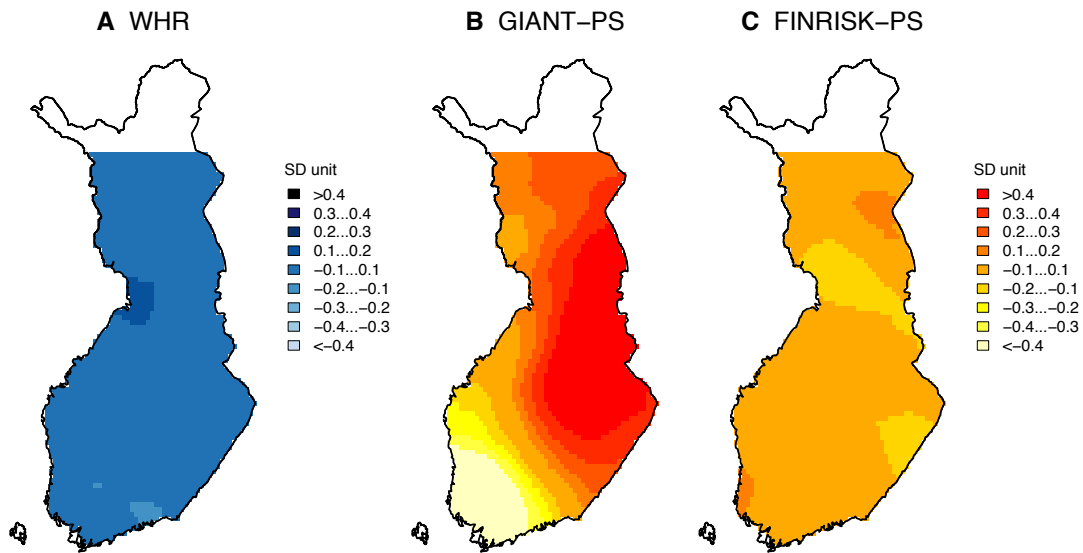

**Figure S11. Geographic distributions for WHR.**

A) Distribution of sex, age, age<sup>2</sup> and BMI adjusted WHR and polygenic score (PS) distributions of B) GIANT-PS, C) FINRISK-PS for WHR (adjusted for BMI) in Finland. The values are in standard deviation unit. The observed WHR (adjusted for BMI) does not show differences between subpopulations (95% CI: -0.0009, 0.0072).

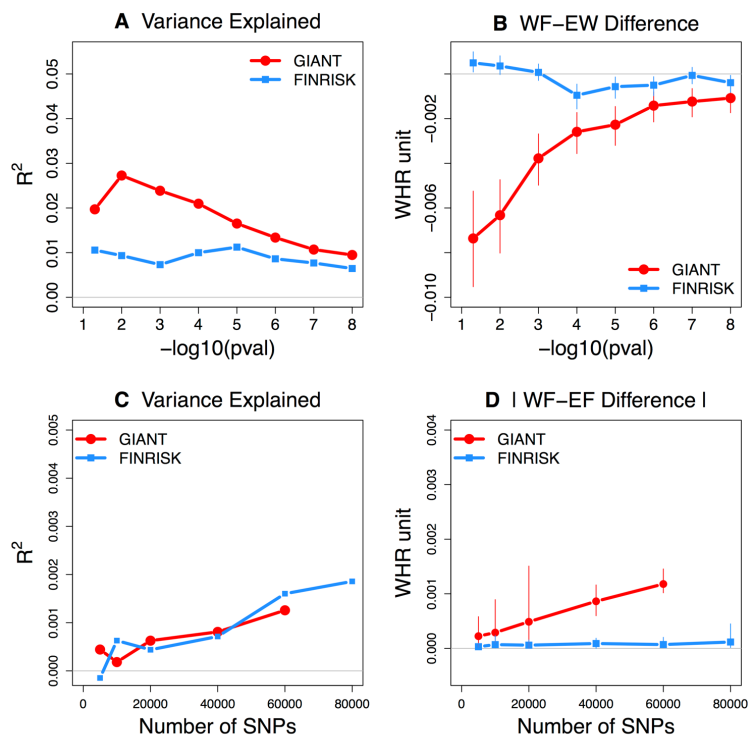

**Figure S12. Comparison of PS constructed from WHR-associated versus random SNPs.**

Top row: A) WHR variance explained by PS and B) predicted East-West difference in WHR (adjusted for BMI) by PS, as a function of P-value threshold in GWAS data.

Bottom row: C) WHR variance explained by PS and D) predicted East-West difference in WHR (adjusted for BMI) by PS, as a function of the number of independent variants in PS when all variants have P-value > 0.5 in GWAS. 95% CI is so small for FINRISK that it is not visible in the figure. Variance explained is given as adjusted R<sup>2</sup>. Both R<sup>2</sup> and WF-EF difference is based on the mean of 10 random scores and error bars in panel D refer to a min-max-range of the 10 PS.



## Supplemental Tables

|            | SNPs   | Latitude |          | Longitude |          | WF-EF Difference<br>(95% CI) |
|------------|--------|----------|----------|-----------|----------|------------------------------|
|            |        | Estimate | P-val    | Estimate  | P-val    |                              |
| <b>CAD</b> | 19,597 | 0.071    | 2.0e-6   | 0.11      | 4.2e-40  | -0.63 (-0.71, -0.55)         |
| <b>RA</b>  | 32,736 | 0.10     | 4.4e-11  | 0.11      | 2.2e-41  | -0.63 (-0.71, -0.55)         |
| <b>CD</b>  | 21,771 | 7.7e-3   | 6.2e-1   | -0.01     | 1.9e-1   | 0.10 (0.01, 0.19)            |
| <b>UC</b>  | 23,513 | 0.07     | 2.6e-5   | 0.04      | 2.6e-7   | -0.26 (-0.35, -0.18)         |
| <b>SCZ</b> | 30,311 | 0.06     | 3.1e-4   | 0.07      | 3.2e-17  | -0.35 (-0.43, -0.26)         |
| <b>BMI</b> | 12,742 | 0.09     | 2.2e-8   | 0.09      | 8.1e-31  | -0.53 (-0.61, -0.44)         |
| <b>WHR</b> | 13,727 | 0.24     | 3.5e-60  | 0.18      | 4.0e-125 | -1.16 (-1.23, -1.09)         |
| <b>HG</b>  | 27,066 | -0.35    | 2.7e-135 | -0.27     | 2.8e-320 | 1.51 (1.45, 1.58)            |

**Table S1. Results from the standard linear model without accounting for genetic relatedness.** SNPs=number of variants in polygenic score (PS). East-West difference in PS is given in standard deviation unit of PS.

|                   | R <sup>2</sup>   |                  |                 | WF-EF difference (cm) |                |                |
|-------------------|------------------|------------------|-----------------|-----------------------|----------------|----------------|
|                   | All<br>(n=2,373) | East<br>(n=1601) | West<br>(n=772) | All                   | East           | West           |
| <b>GIANT-PS</b>   | 0.1402           | 0.1771           | 0.1727          | 3.5 (3.1, 3.9)        | 6.4 (5.7, 7.1) | 4.7 (3.9,5.4)  |
| <b>UKBB-PS</b>    | 0.2229           | 0.2126           | 0.2241          | 0.6 (0.4, 0.9)        | 0.6 (0.4, 0.9) | 0.6 (0.4,0.9)  |
| <b>FINRISK-PS</b> | 0.1542           | 0.1581           | 0.104           | 1.4 (1.1, 1.6)        | 1.3 (1.1, 1.6) | 1.3 (1.0, 1.6) |

**Table S2. Linear regression results for explaining HG with PS.**

Model was applied either to all samples or separately to the eastern or western subpopulation.

|                  | Correlation with PC1 | R <sup>2</sup>        |                      | WF-EF difference (95% CI; SD units) |                        |
|------------------|----------------------|-----------------------|----------------------|-------------------------------------|------------------------|
|                  |                      | Before PC1 adjustment | After PC1 adjustment | Before PC1 adjustment               | After PC1 adjustment   |
| GIANT-PS         | -0.798               | 0.1402                | 0.1916               | 1.51<br>(1.45, 1.58)                | 0.05<br>(-0.03, 0.14)  |
| GIANT-NOFINNS-PS | -0.354               | 0.1721                | 0.1527               | 0.70 (0.62, 0.79)                   | 0.04 (-0.05, 0.13)     |
| UKBB-PS          | -0.103               | 0.2229                | 0.2118               | 0.23<br>(0.14, 0.32)                | 0.03<br>(-0.06, 0.12)  |
| FINRISK-PS       | -0.304               | 0.1542                | 0.1352               | 0.59<br>(0.51, 0.67)                | -0.01<br>(-0.09, 0.07) |

**Table S3. Correlation between PS and PC1 and HG variance explained (R<sup>2</sup>) by PS before and after adjustment for PC1.**

|                       | SNPs   | Latitude |         | Longitude |         | WF-EF Difference (95% CI) |
|-----------------------|--------|----------|---------|-----------|---------|---------------------------|
|                       |        | Estimate | P-val   | Estimate  | P-val   |                           |
| <b>Finns excluded</b> | 30,311 | 0.04     | 8.7e-2  | 0.04      | 4.0e-3* | -0.35 (-0.43, -0.26)      |
| <b>Finns included</b> | 30,760 | 0.10     | 3.1e-6* | 0.05      | 2.6e-4* | -0.41 (-0.49, -0.32)      |

**Table S4. Comparison of Finns-excluded and Finns-included GWAS in schizophrenia.**

Results are shown for the linear model similarly to Table 1 in the main text. SNPs=number of variants in polygenic score (PS). Difference in PS between EF and WF subpopulations is given in standard deviation unit of PS.

|                              | FINRISK        |                               | UK Biobank     |                               |
|------------------------------|----------------|-------------------------------|----------------|-------------------------------|
|                              | R <sup>2</sup> | WF-EF difference (95% CI, cm) | R <sup>2</sup> | WF-EF difference (95% CI, cm) |
| <b>Standard linear model</b> | 15%            | 1.35 (1.14 – 1.58)            | 22%            | 0.64 (0.39 – 0.89)            |
| <b>Linear mixed model</b>    | 15%            | 1.15 (0.94 – 1.38)            | 25%            | 0.37 (0.10 - 0.64)            |

**Table S5. Comparison of PS for HG using GWAS results based on standard linear model adjusted for 10 principal components or linear mixed model in FINRISK and UK Biobank data.**

|                   | SNPs   | R <sup>2</sup> | Latitude |       | Longitude |        | WF-EF Difference (95% CI) | Correlation with PC1 | R <sup>2</sup>        |                      |
|-------------------|--------|----------------|----------|-------|-----------|--------|---------------------------|----------------------|-----------------------|----------------------|
|                   |        |                | Estimate | P-val | Estimate  | P-val  |                           |                      | Before PC1 adjustment | After PC1 adjustment |
| <b>GIANT-PS</b>   | 12,742 | 8.0 %          | 0.03     | 0.094 | 0.04      | 1.8e-3 | -0.64 (-0.77, -0.51)      | 0.286                | 8.0 %                 | 7.8 %                |
| <b>UKBB-PS</b>    | 75,979 | 4.9 %          | 0.01     | 0.60  | 0.01      | 0.67   | -0.05 (-0.14, 0.03)       | 0.048                | 4.9 %                 | 4.8 %                |
| <b>FINRISK-PS</b> | 44,920 | 1.3 %          | -0.01    | 0.80  | -0.002    | 0.90   | -0.08 (-0.14, -0.04)      | 0.098                | 1.3 %                 | 1.2 %                |

**Table S6. Comparison of BMI PS.**

(Similar to Table 2 and Table S1 for HG.)

|                   | SNPs   | R <sup>2</sup> | Latitude |        | Longitude |         | WF-EF Difference (95% CI) | Correlation with PC1 | R <sup>2</sup>        |                      |
|-------------------|--------|----------------|----------|--------|-----------|---------|---------------------------|----------------------|-----------------------|----------------------|
|                   |        |                | Estimate | P-val  | Estimate  | P-val   |                           |                      | Before PC1 adjustment | After PC1 adjustment |
| <b>GIANT-PS</b>   | 13,130 | 2.0 %          | 0.10     | 1.0e-9 | 0.08      | 4.7e-12 | -0.007 (-0.01, -0.005)    | 0.58                 | 2.0 %                 | 2.2 %                |
| <b>FINRISK-PS</b> | 43,252 | 1.1 %          | -0.11    | 0.63   | -0.03     | 0.017   | 5e-4 (1e-4, 1e-3)         | -0.04                | 1.1 %                 | 1.1 %                |

**Table S7. Comparison of WHR PS.**

(Similar to Table 2 and Table S1 for HG.)

## SUPPLEMENTAL TEXT S1: DISTRIBUTION OF POLYGENIC SCORE DIFFERENCE

Consider  $M$  independent variants and assume that standard error of effect size estimate of variant  $k$  is  $s_k$ . For both quantitative traits and diseases,  $s_k \approx c \cdot (2f_k(1-f_k))^{-\frac{1}{2}}$ , where  $f_k$  is the minor allele frequency of variant  $k$  and  $c$  is a constant that depends on the sample size and observed phenotypic variance in the GWAS data but is independent of  $k$ .

Assume that true effects are zero at these variants whence  $\hat{\beta}_k \sim \mathcal{N}(0, s_k^2)$ . Denote the z-score by  $\hat{z}_k = \hat{\beta}_k / s_k \sim \mathcal{N}(0, 1)$ .

The polygenic score for individual  $i$  is

$$p_i = \sum_{k=1}^M g_{ik} \hat{\beta}_k = \sum_{k=1}^M g_{ik} s_k \hat{z}_k,$$

where  $g_{ik}$  is the effect allele dosage of  $i$  at variant  $k$ . By mean-centering the score, we may assume that the allele dosages were mean-centered at every variant.

Since effect estimates and genotypes are independent,  $E(p_i) = 0$  and

$$\text{Var}(p_i) = \sum_{k=1}^M E(g_{ik}^2 s_k^2 \hat{z}_k^2) = \sum_{k=1}^M 2f_k(1-f_k) \cdot s_k^2 \cdot 1 = Mc^2.$$

Hence, the standardized score is  $p_i^* = p_i / (\sqrt{Mc})$ .

Consider the difference  $\Delta$  between scores of a Western and an Eastern individual:

$$\Delta = p_W^* - p_E^* = \sum_{k=1}^M \frac{(g_{Wk} - g_{Ek})}{\sqrt{Mc}} s_k \hat{z}_k = \sum_{k=1}^M \frac{(g_{Wk} - g_{Ek})}{\sqrt{2Mf_k(1-f_k)}} \hat{z}_k.$$

$E(\Delta) = 0$  because  $E(\hat{z}_k) = 0$  and

$$\text{Var}(\Delta) = \sum_{k=1}^M \frac{\text{Var}((g_{Wk} - g_{Ek}) \hat{z}_k)}{2Mf_k(1-f_k)} = \text{Var} \left( \frac{(g_{Wk} - g_{Ek}) \hat{z}_k}{\sqrt{2f_k(1-f_k)}} \right).$$

Variance of  $\Delta$  depends only on the second moment of the distribution of standardized dosage difference between West and East. In particular, variance of  $\Delta$  is independent of  $M$  and sample size and phenotypic variance of the GWAS from which the effect size estimates come from. This explains why the 95% regions of  $\Delta$  appear approximately constant across all traits and diseases considered.

## Supplemental Text S2

To further test the possible bias in GIANT effect estimates, we took the overlapping HG variants between the GIANT-PS and the UKBB data (overlap was 26,853 out of 27,066 variants) and made a new GIANT-UKBB-PS (i.e. using GIANT variants but UKBB effects). We observed that this GIANT-UKBB-PS explained 26% of the height variance in the target sample and, contrary to GIANT-PS, its predictive power was not masked by PC1 ( $R^2$  dropped from 26% to 24% after regressing out PC1 from GIANT-UKBB-PS). Multiple regression unequivocally showed that GIANT-PS was not predictive of HG ( $P = 0.25$ ) when GIANT-UKBB-PS was simultaneously included in the model ( $P = 3e-84$ ). These observations confirm that while the variants in GIANT-PS are useful for predicting HG in Finnish samples, their estimates reported in GIANT are unrealistically strongly associated with the population structure in Finland and that the UKBB effect size estimates considerably improve the predictive power of the corresponding PS. However, we also observed that, despite more accurate effect estimates, the GIANT-UKBB-PS predicted surprisingly large WF-EF difference (2.5 cm [2.0, 2.8]). This suggests that it is not only the bias in effect estimates that drives the geographic difference but also the choice of the variants.
